# Supplementary material for: Ring-opening metathesis polymerization of ester-functionalizedendo-tricyclo[4.2.2.02,5]deca-3,9-dienes and thermal properties of the resulting polymers
Source: Royal Society of Chemistry journal article supplement (doi:10.1039/d3py00052d), 2023-01-01
Supplement: d3py00052d1.pdf [file d3py00052d1.pdf]

*Supporting information for*

**Ring-opening metathesis polymerization of ester-functionalized *endo*-tricyclo[4.2.2.0<sup>2,5</sup>]deca-3,9-dienes and thermal properties of the resulting polymers**

Yuta Asano, Hiromi Aoi, Hajime Ohtani, Shin-ichi Matsuoka, \* Masato Suzuki

Department of Life Science and Applied Chemistry, Graduate School of Engineering, Nagoya Institute of Technology, Gokiso-cho, Showa-ku, Nagoya, Aichi 466-8555, Japan

Corresponding Author

Shin-ichi Matsuoka

<http://orcid.org/0000-0001-7488-9971>; Email: [matsuoka.shinichi@nitech.ac.jp](mailto:matsuoka.shinichi@nitech.ac.jp)

Fax: +81-52-735-7254; Tel: +81-52-735-7254;

## CONTENTS

|                                                                                                                                                                                                           |    |
|-----------------------------------------------------------------------------------------------------------------------------------------------------------------------------------------------------------|----|
| Table S1. Solubility of poly1 and poly2.....                                                                                                                                                              | 3  |
| Figure S1. SEC profiles of (a) poly1 obtained by G3 (2.0 mol%) in DMF at r.t. and (b) poly1 after the chain extension experiment by the addition of the same amount of 1.....                             | 3  |
| Figure S2. SEC profiles of (a) poly2 obtained by G3 (1.0 mol%) in CH <sub>2</sub> Cl <sub>2</sub> at r.t. and (b) poly2 after the chain extension experiment by the addition of the same amount of 2..... | 4  |
| Figure S3. SEC profiles of (a) poly2 obtained by G1 (1.0 mol%) in CH <sub>2</sub> Cl <sub>2</sub> at r.t. and (b) poly2 after the chain extension experiment by the addition of the same amount of 2..... | 4  |
| Figure S4. XRD profiles of poly1 and poly2.....                                                                                                                                                           | 5  |
| Figure S5. TGA curves of poly1 and poly(1-co-NB) at compositions of 1: 0.50 (a) and 0.20 (b). ....                                                                                                        | 5  |
| Figure S6. DSC profiles of poly(1-co-NB) at various compositions of 1: 0.20 (a), 0.38 (b), 0.50 (c).....                                                                                                  | 6  |
| Figure S7. TGA curves of poly2 and poly(2-co-NB) at compositions of 2: 0.53 (a) and 0.40 (b). ....                                                                                                        | 6  |
| Figure S8. DSC profiles of poly(2-co-NB) at various compositions of 2: 0.25 (a), 0.40 (b), 0.50 (c).....                                                                                                  | 7  |
| Figure S9. Py-EGA thermograms of poly1. ....                                                                                                                                                              | 8  |
| Figure S10. EGA-GC/MS analysis and thermal decomposition products of poly1.....                                                                                                                           | 9  |
| Figure S11. Py-EGA thermograms of poly2. ....                                                                                                                                                             | 10 |
| Figure S12. EGA-GC/MS analysis and thermal decomposition products of poly2.....                                                                                                                           | 11 |
| Figure S13. <sup>1</sup> H NMR spectrum of 1 in CDCl <sub>3</sub> (700 MHz).....                                                                                                                          | 12 |
| Figure S14. <sup>13</sup> C NMR spectrum of 1 in CDCl <sub>3</sub> (175 MHz).....                                                                                                                         | 13 |
| Figure S15. HSQC spectrum of 1. ....                                                                                                                                                                      | 14 |
| Figure S16. NOE spectra (a) and (b), and <sup>1</sup> H NMR spectrum (c) of 1 in CDCl <sub>3</sub> (700 MHz). ....                                                                                        | 14 |
| Figure S17. <sup>1</sup> H NMR spectrum of 2 in CDCl <sub>3</sub> (400 MHz). ....                                                                                                                         | 15 |
| Figure S18. <sup>13</sup> C NMR spectrum of 2 in CDCl <sub>3</sub> (100 MHz).....                                                                                                                         | 16 |
| Figure S19. NOESY spectrum of 2. ....                                                                                                                                                                     | 16 |
| Figure S20. SEC profiles of poly1 shown in Table 1.....                                                                                                                                                   | 17 |
| Figure S21. SEC profiles of poly2 shown in Table 1.....                                                                                                                                                   | 18 |
| Figure S22. <sup>1</sup> H NMR spectrum of poly1 in DMSO- <i>d</i> <sub>6</sub> (400 MHz). ....                                                                                                           | 19 |
| Figure S23. <sup>1</sup> H NMR spectrum of poly2 in CDCl <sub>3</sub> (400 MHz).....                                                                                                                      | 19 |
| Figure S24. COSY spectrum of poly2.....                                                                                                                                                                   | 20 |
| Figure S25. <sup>13</sup> C NMR spectrum of poly2 in CDCl <sub>3</sub> (100 MHz).....                                                                                                                     | 20 |
| Figure S26. HMQC spectrum of poly2.....                                                                                                                                                                   | 21 |
| Figure S27. <sup>1</sup> H NMR spectrum of poly(1-co-NB) in CDCl <sub>3</sub> (400 MHz). ....                                                                                                             | 22 |
| Figure S28. <sup>1</sup> H NMR spectrum of poly(2-co-NB) in CDCl <sub>3</sub> (400 MHz). ....                                                                                                             | 23 |

**Table S1. Solubility of poly1 and poly2.**

|       | hexane | toluene | xylylene | CH <sub>2</sub> Cl <sub>2</sub> | CHCl <sub>3</sub> | PhCl | o-DCB | THF | EtOAc | DMF | DMAc | DMSO |
|-------|--------|---------|----------|---------------------------------|-------------------|------|-------|-----|-------|-----|------|------|
| poly1 | -      | -       | -        | -                               | -                 | -    | -     | -   | -     | +   | +    | +    |
| poly2 | -      | -       | -        | ++                              | ++                | +    | +     | ++  | -     | ++  | ++   | ++   |

- : poor + : partially ++ : good

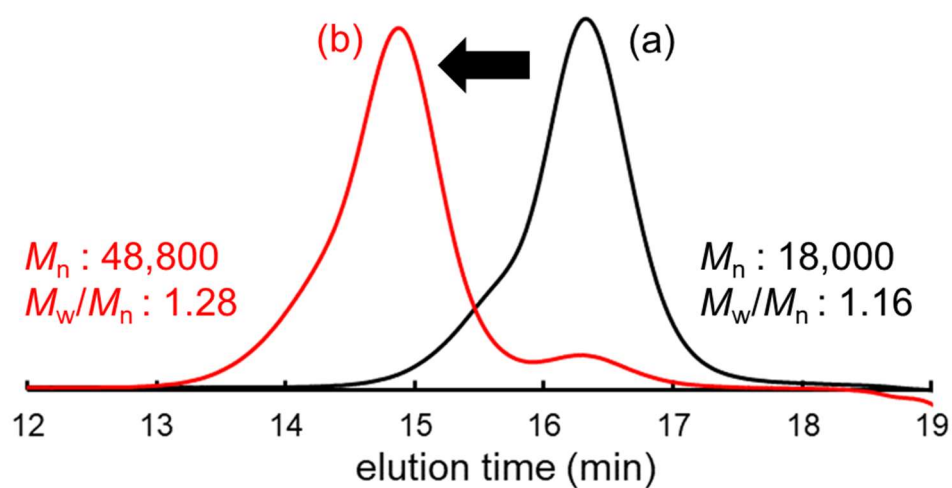

**Figure S1. SEC profiles of (a) poly1 obtained by G3 (2.0 mol%) in DMF at r.t. and (b) poly1 after the chain extension experiment by the addition of the same amount of 1 (DMF eluent, PMMA standards).**

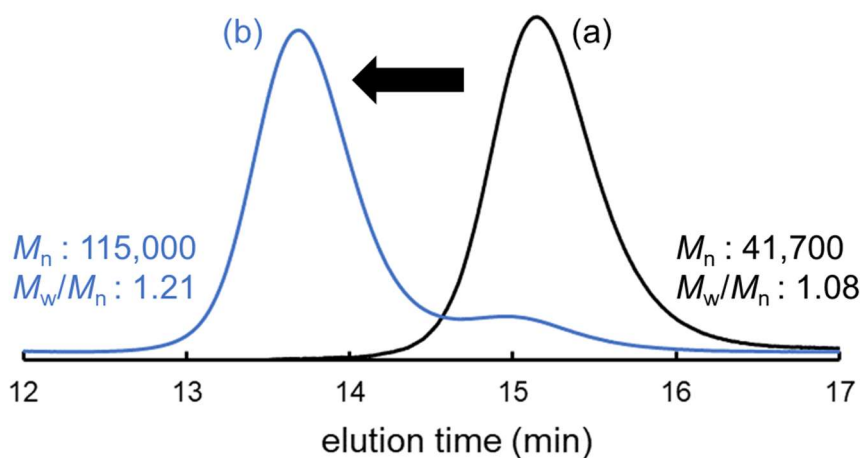

**Figure S2. SEC profiles of (a) poly2 obtained by G3 (1.0 mol%) in  $\text{CH}_2\text{Cl}_2$  at r.t. and (b) poly2 after the chain extension experiment by the addition of the same amount of 2 (DMF eluent, PMMA standards).**

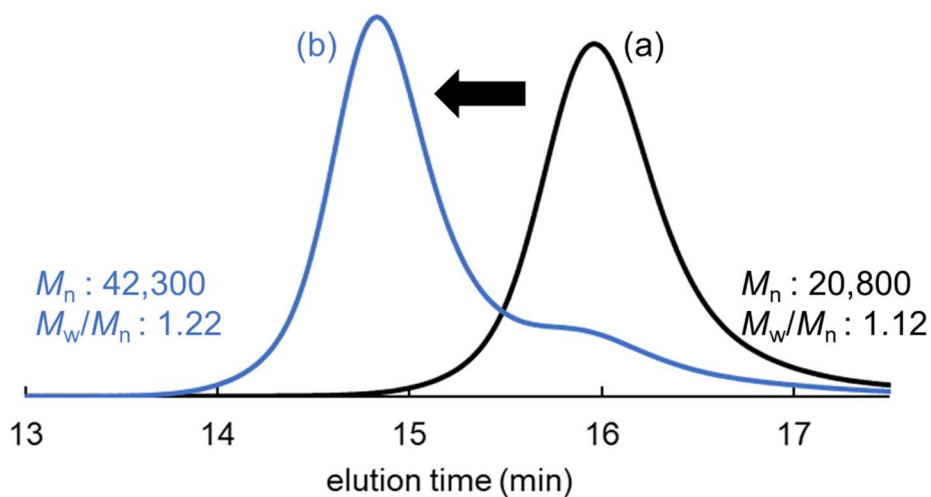

**Figure S3. SEC profiles of (a) poly2 obtained by G1 (1.0 mol%) in  $\text{CH}_2\text{Cl}_2$  at r.t. and (b) poly2 after the chain extension experiment by the addition of the same amount of 2 (DMF eluent, PMMA standards).**

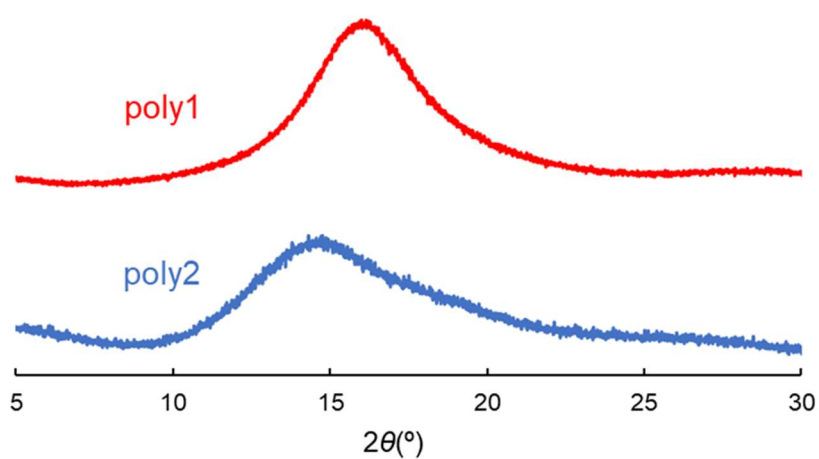

Figure S4. XRD profiles of poly1 and poly2.

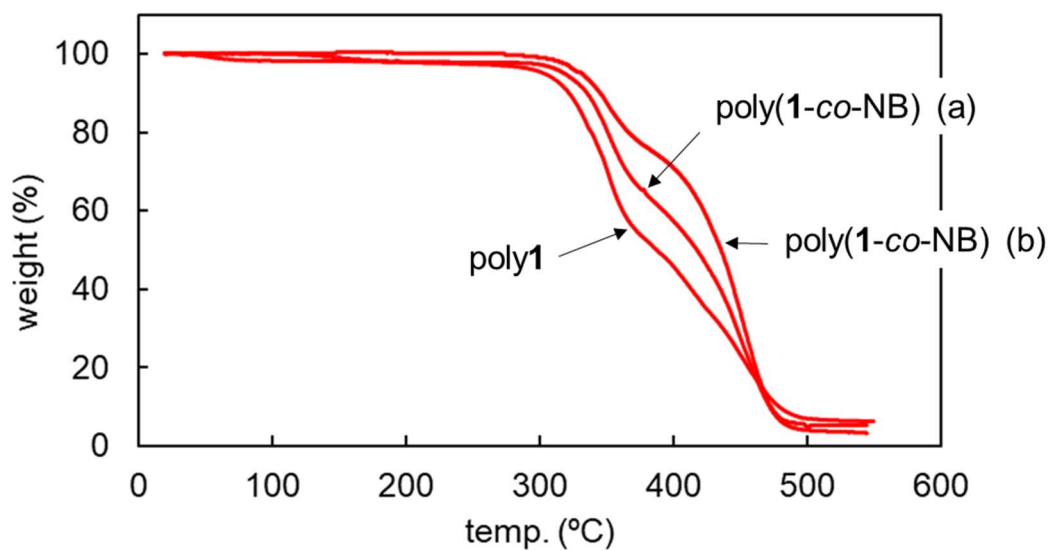

Figure S5. TGA curves of poly1 and poly(1-co-NB) at compositions of 1: 0.50 (a) and 0.20 (b).

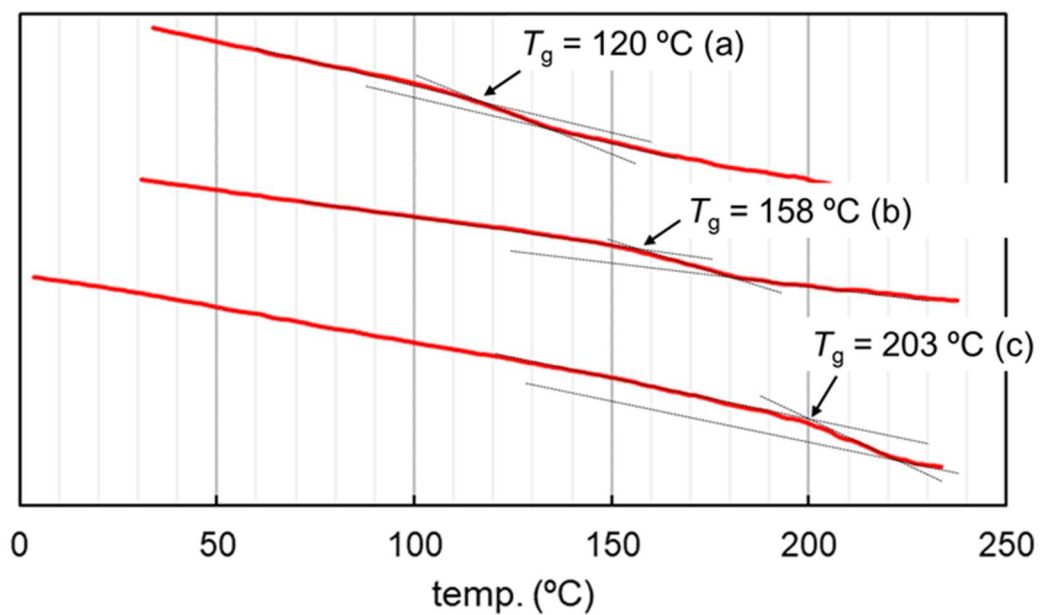

Figure S6. DSC profiles of poly(1-co-NB) at various compositions of 1: 0.20 (a), 0.38 (b), 0.50 (c).

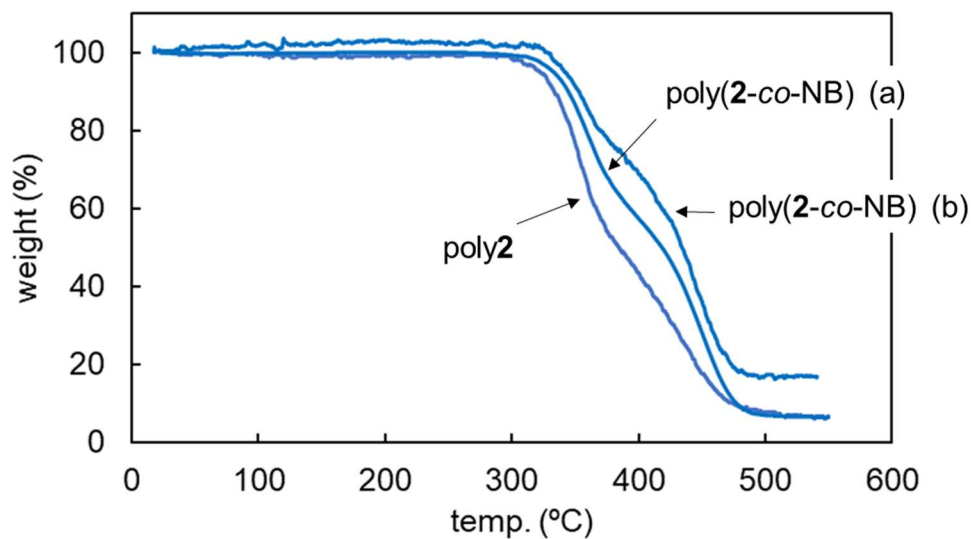

Figure S7. TGA curves of poly2 and poly(2-co-NB) at compositions of 2: 0.53 (a) and 0.40 (b).

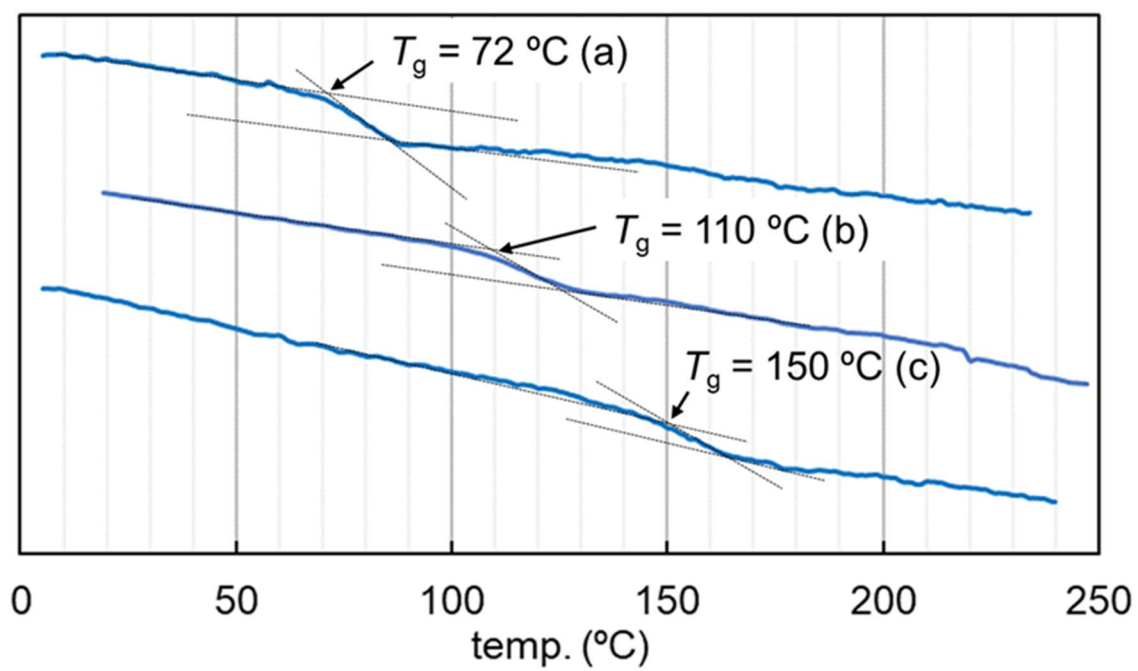

Figure S8. DSC profiles of poly(2-co-NB) at various compositions of 2: 0.25 (a), 0.40 (b), 0.50 (c).

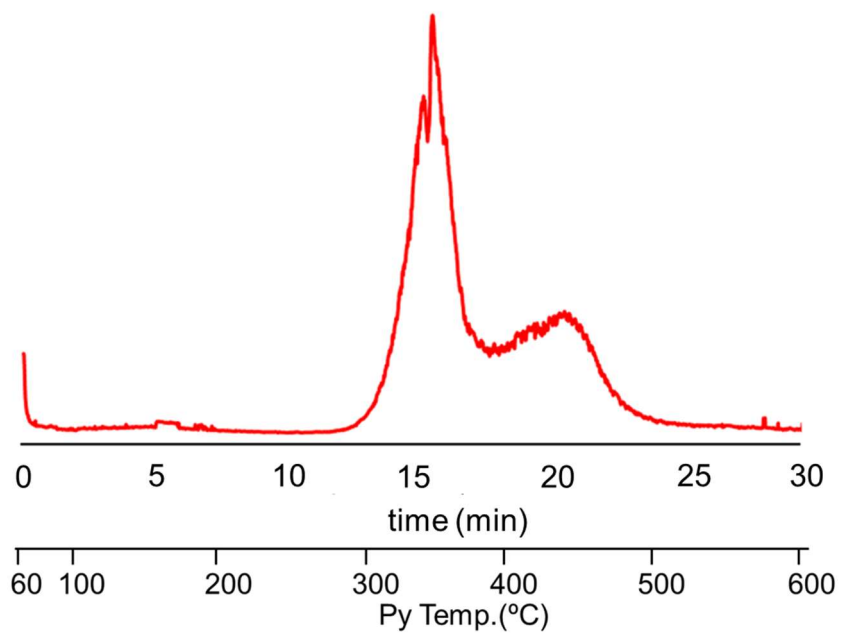

**Figure S9. Py-EGA thermograms of poly1.**



(A) 320–360 °C

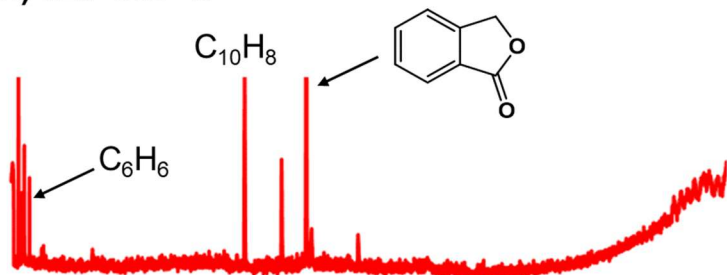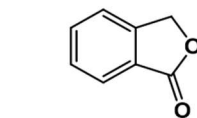

|       |                |        |        |
|-------|----------------|--------|--------|
| $m/z$ | $[M]^+$        | calcd. | 134.13 |
|       |                | found  | 134    |
|       | $[M-COH]^+$    | calcd. | 105.12 |
|       |                | found  | 105    |
|       | $[M-CO_2H]^+$  | calcd. | 89.14  |
|       |                | found  | 89     |
|       | $[M-CO_2CH]^+$ | calcd. | 77.11  |
|       |                | found  | 77     |

(B) 360–400 °C

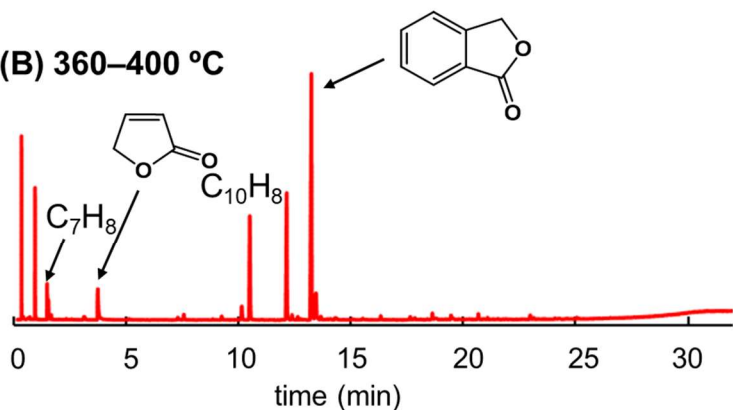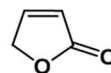

|       |               |        |       |
|-------|---------------|--------|-------|
| $m/z$ | $[M]^+$       | calcd. | 84.07 |
|       |               | found  | 84    |
|       | $[M-COH]^+$   | calcd. | 55.03 |
|       |               | found  | 55    |
|       | $[M-CO_2H]^+$ | calcd. | 39.05 |
|       |               | found  | 39    |

Figure S10. EGA-GC/MS analysis and thermal decomposition products of poly1.

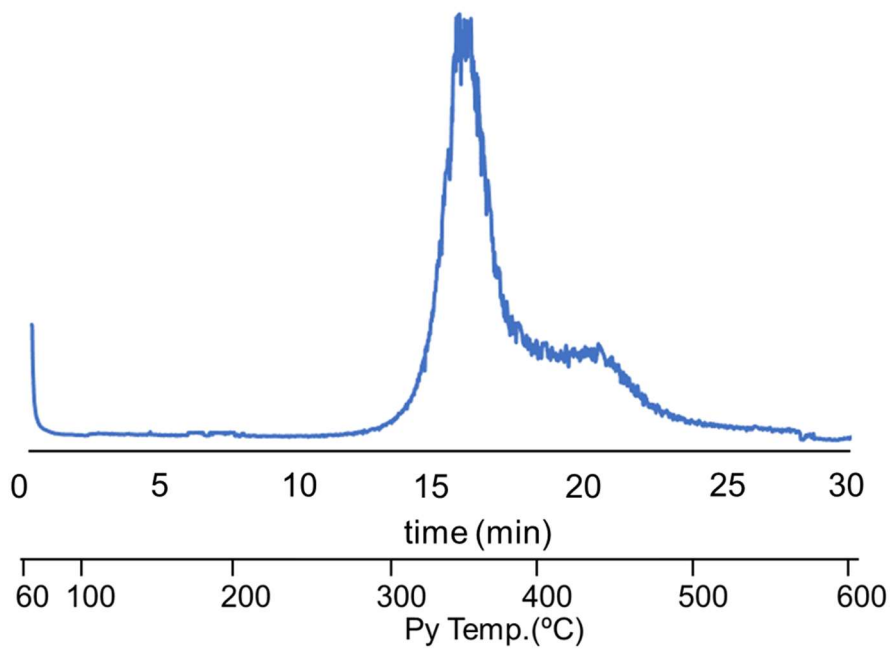

**Figure S11. Py-EGA thermograms of poly2.**

(A) 320–360 °C

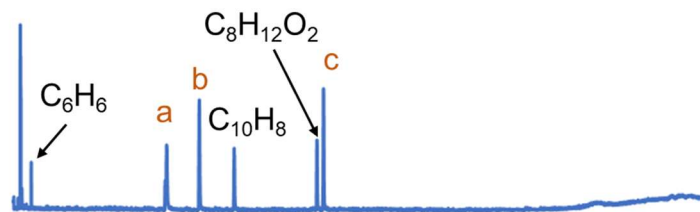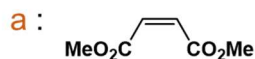

$m/z$   $[M-OCH_3]^+$  calcd. 113.09  
found 113  
 $[M-CO_2CH_3]^+$  calcd. 85.09  
found 85

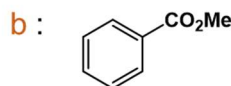

$m/z$   $[M]^+$  calcd. 136.15  
found 136  
 $[M-OCH_3]^+$  calcd. 105.12  
found 105  
 $[M-CO_2CH_3]^+$  calcd. 77.11  
found 77

(B) 360–400 °C

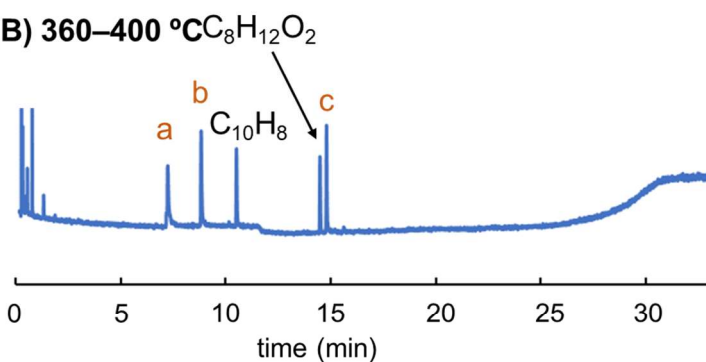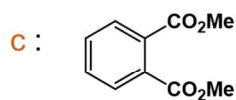

$m/z$   $[M]^+$  calcd. 194.19  
found 194  
 $[M-OCH_3]^+$  calcd. 163.15  
found 163  
 $[M-C_4O_4H_5]^+$  calcd. 77.11  
found 77

Figure S12. EGA-GC/MS analysis and thermal decomposition products of poly2.

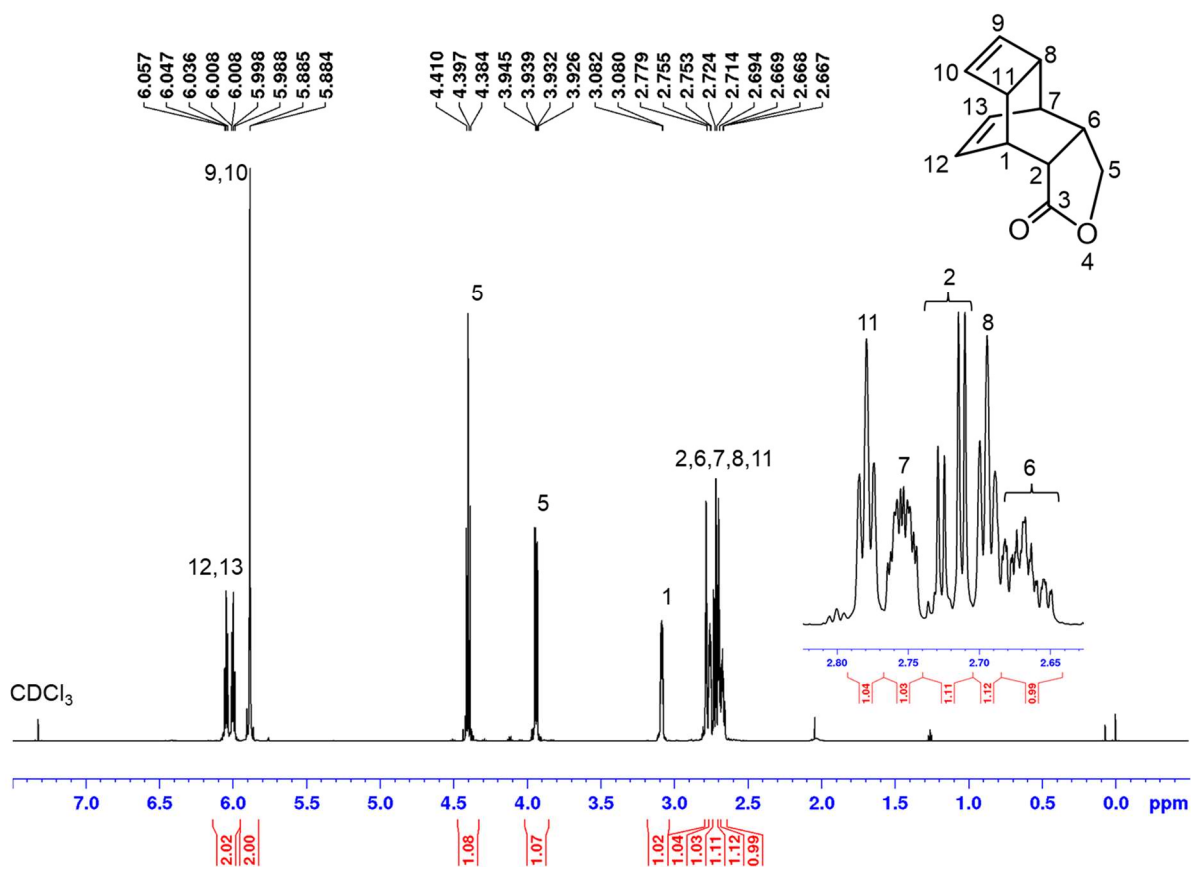

Figure S13.  $^1\text{H}$  NMR spectrum of 1 in  $\text{CDCl}_3$  (700 MHz).

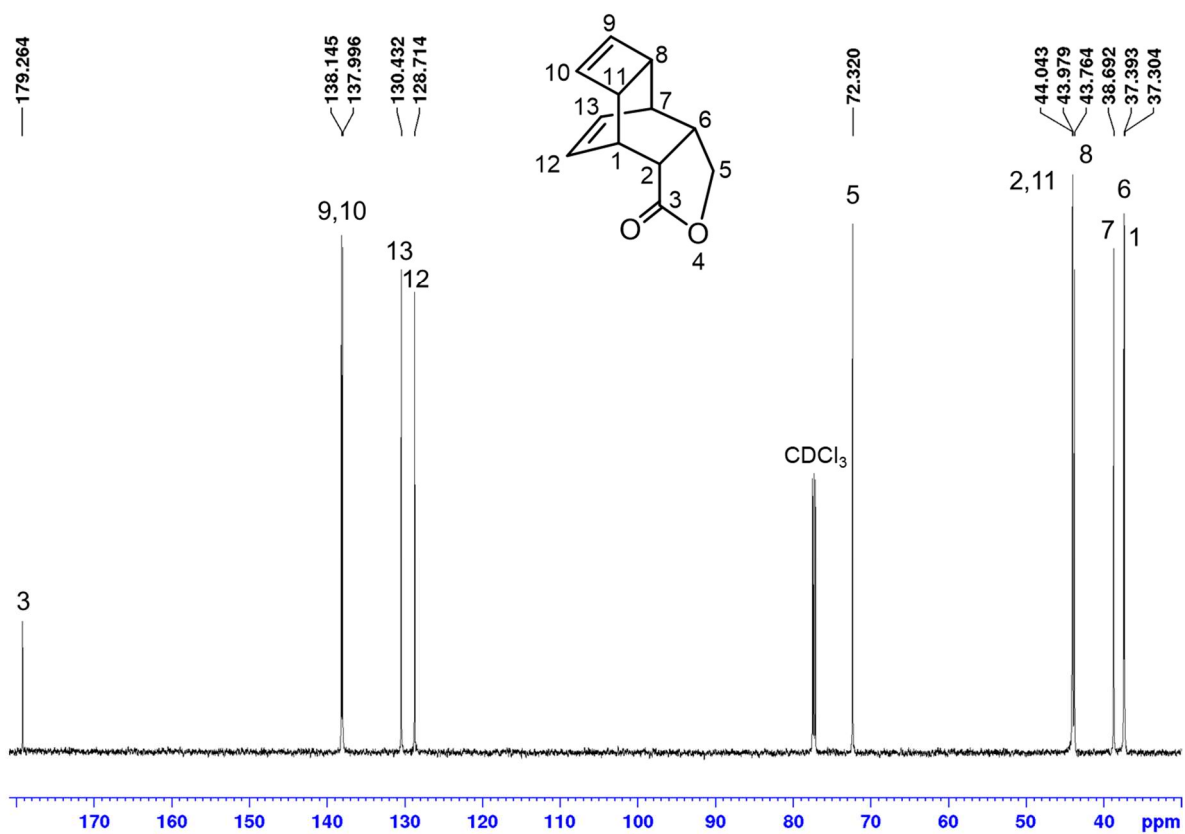

Figure S14.  $^{13}\text{C}$  NMR spectrum of 1 in  $\text{CDCl}_3$  (175 MHz).

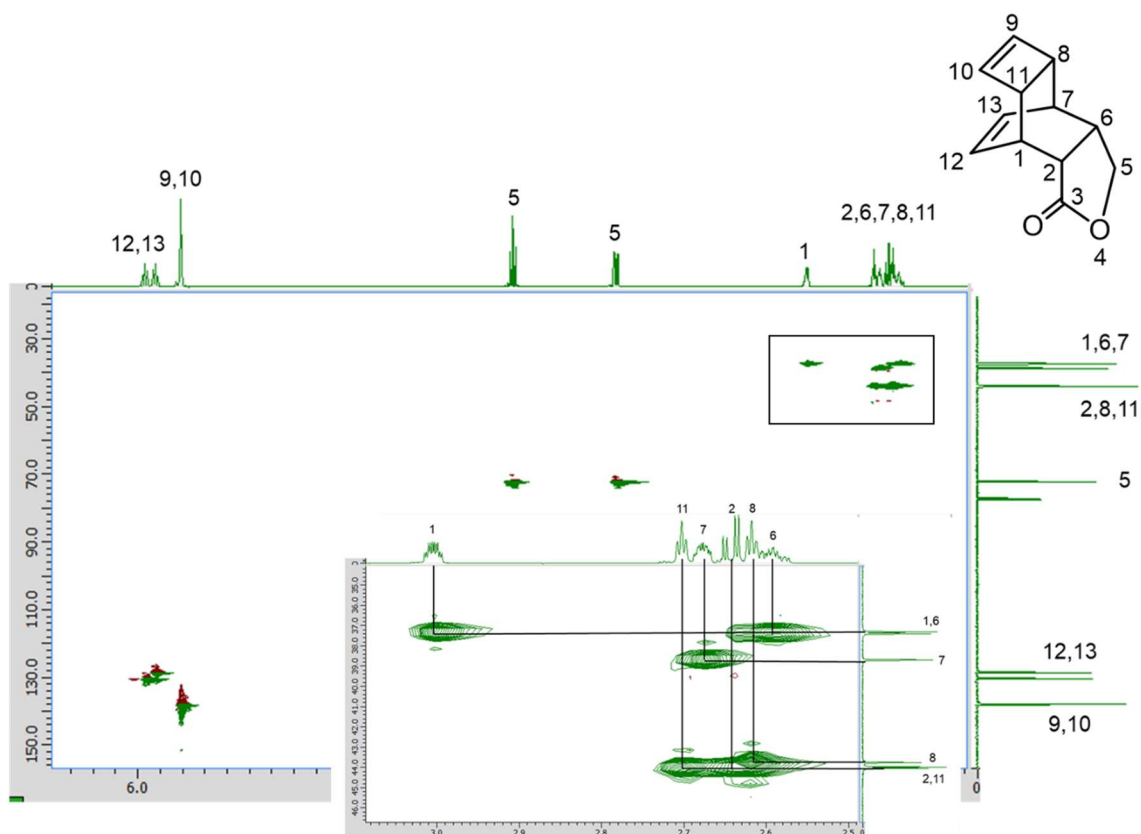

Figure S15. HSQC spectrum of **1**.

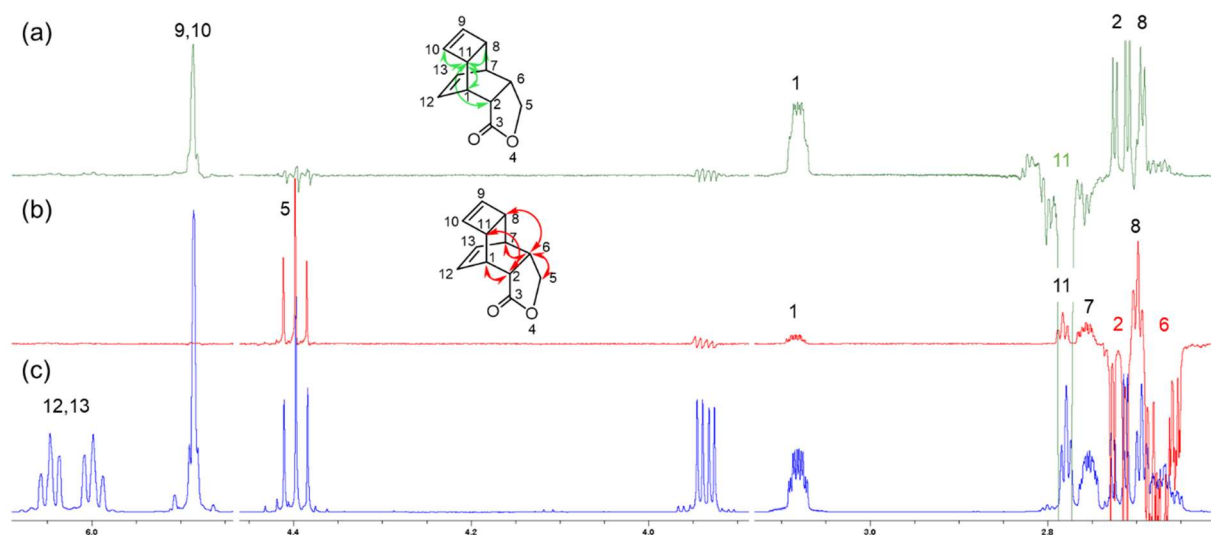

Figure S16. NOE spectra (a) and (b), and  $^1\text{H}$  NMR spectrum (c) of **1** in  $\text{CDCl}_3$  (700 MHz).

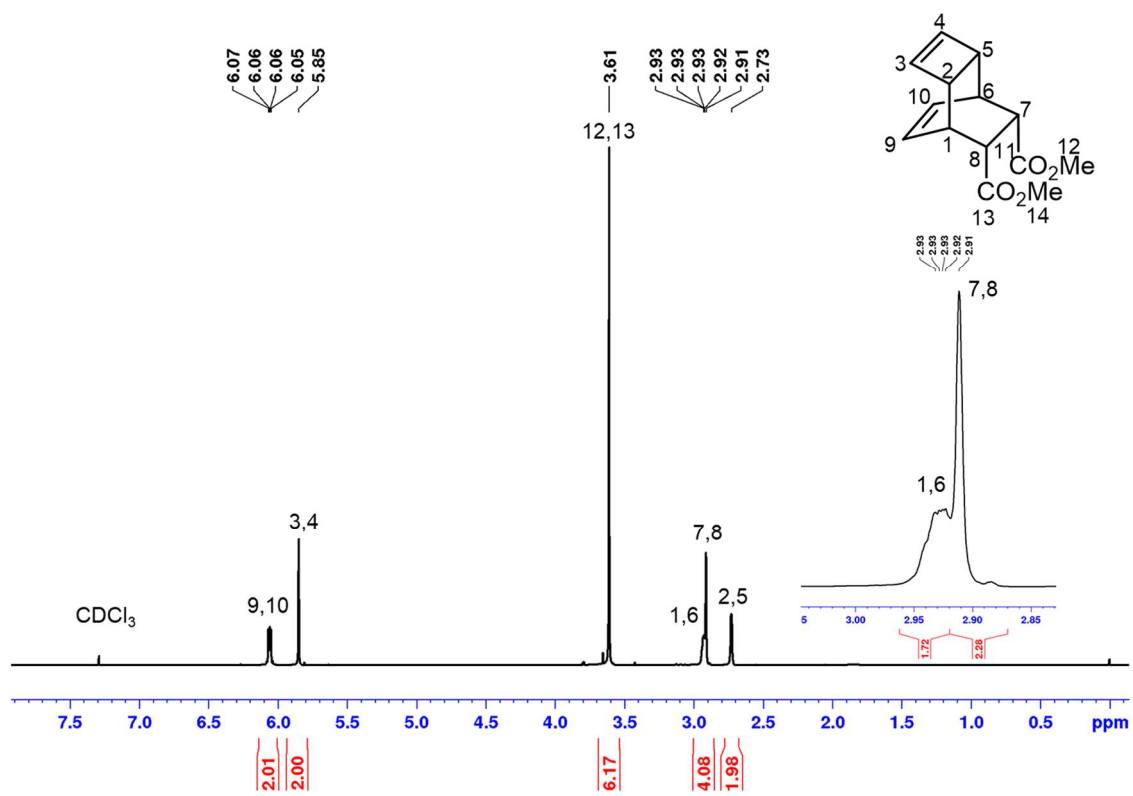

Figure S17.  $^1\text{H}$  NMR spectrum of **2** in  $\text{CDCl}_3$  (400 MHz).

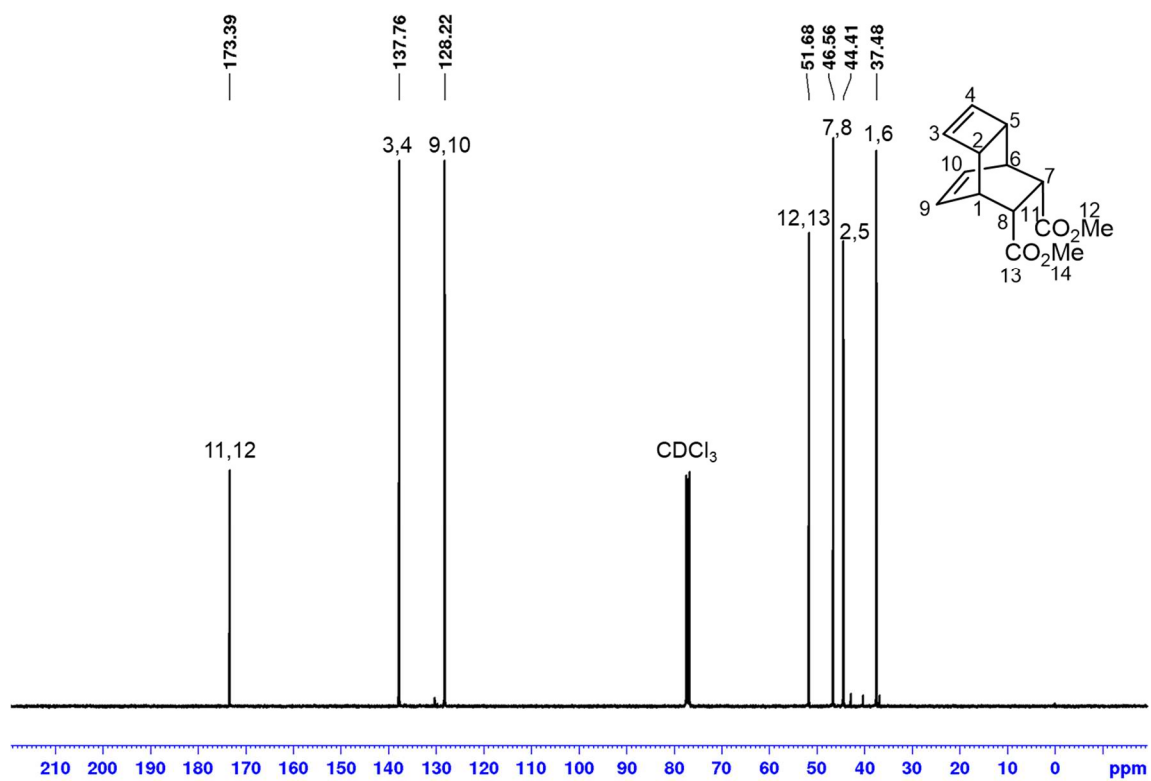

Figure S18.  $^{13}\text{C}$  NMR spectrum of **2** in  $\text{CDCl}_3$  (100 MHz).

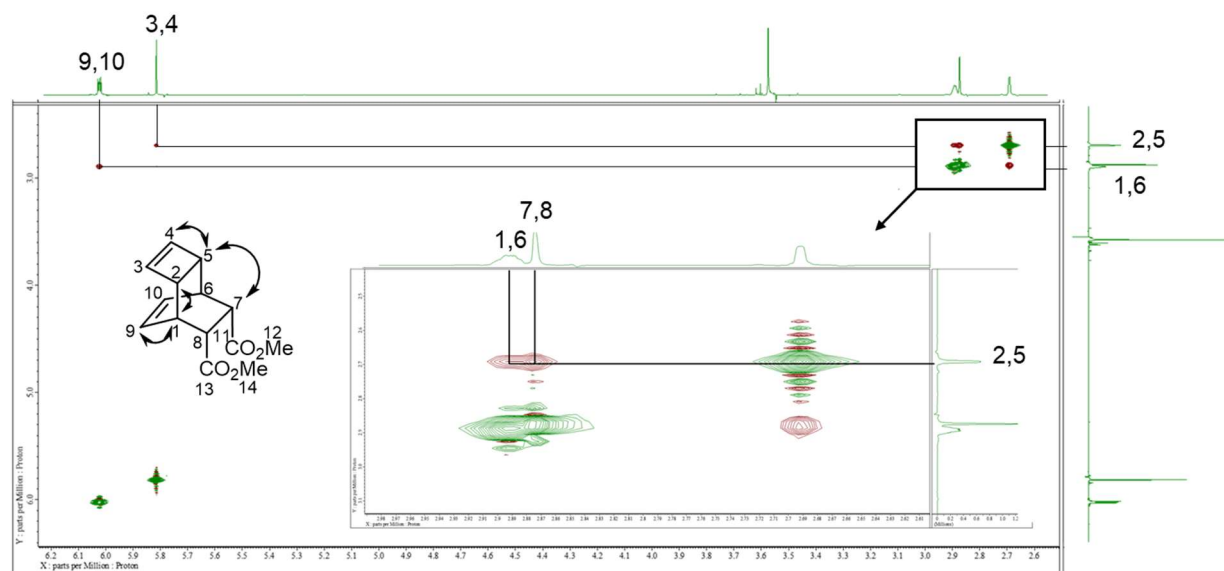

Figure S19. NOESY spectrum of **2**.



entry 2

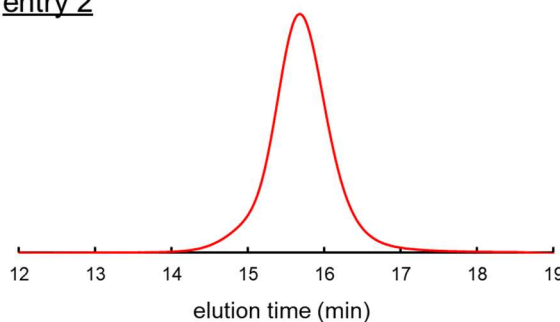

entry 3

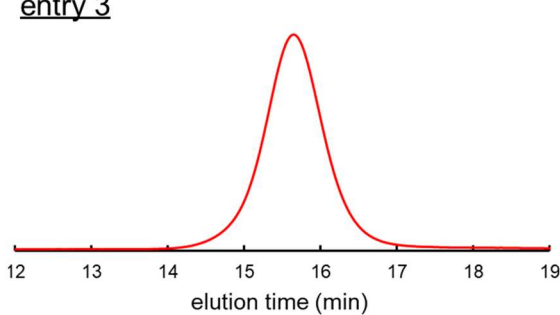

entry 4

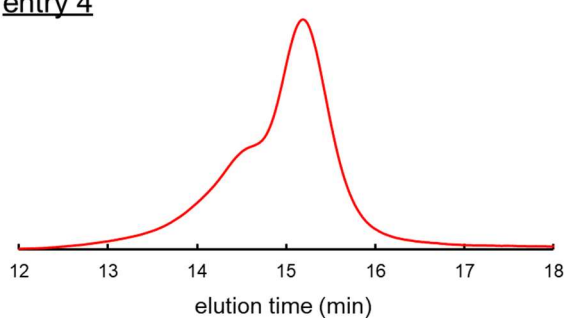

entry 5

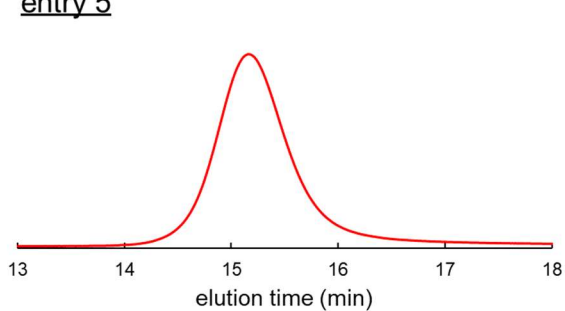

entry 6

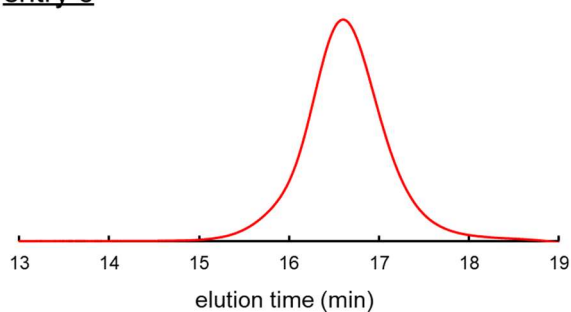

entry 7

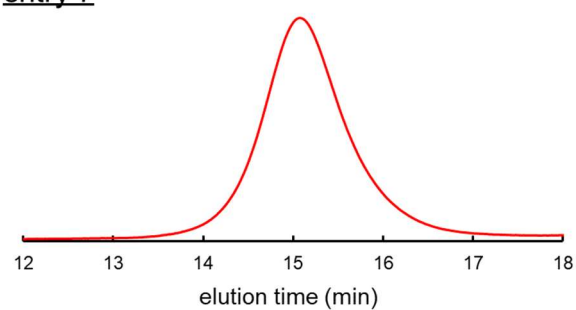

entry 8

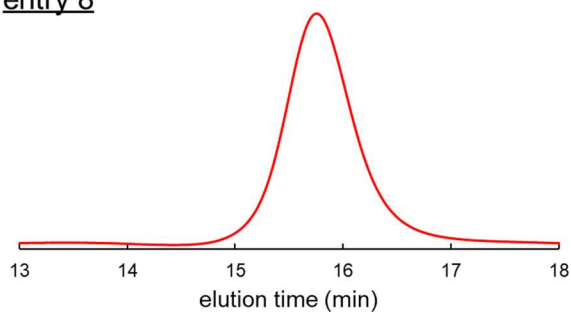

entry 9

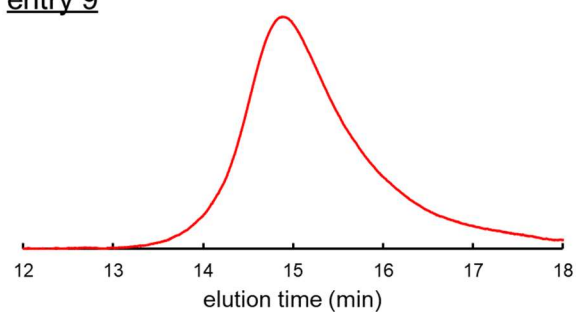

**Figure S20. SEC profiles of poly1 shown in Table 1 (DMF eluent, PMMA standards).**

entry 10

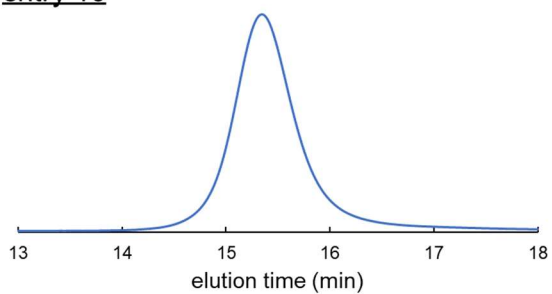

entry 11

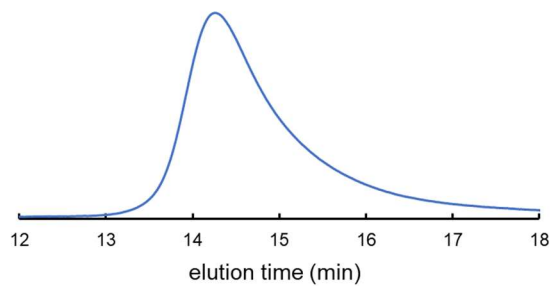

entry 12

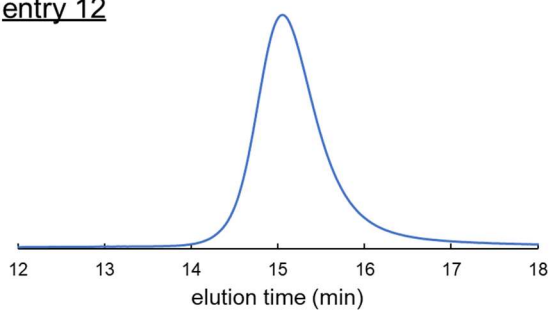

entry 13

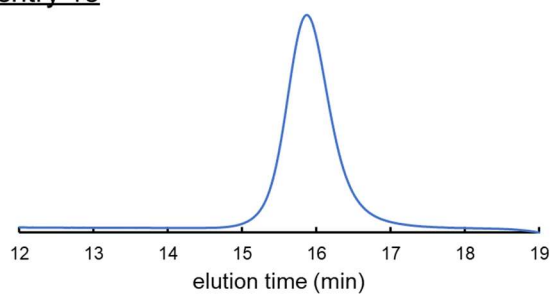

entry 14

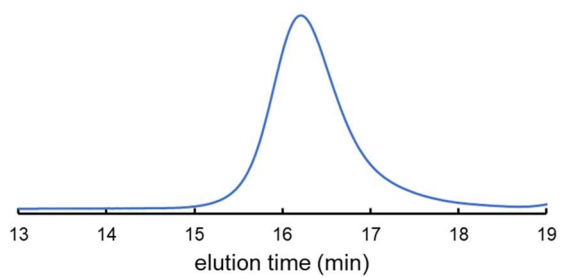

entry 15

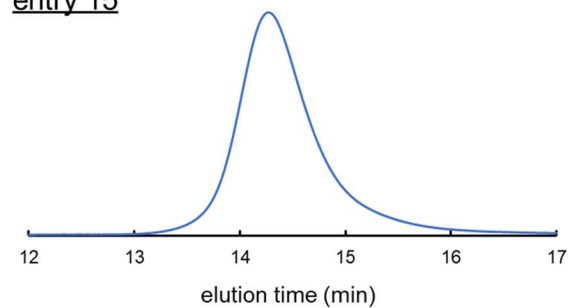

**Figure S21. SEC profiles of poly2 shown in Table 1 (DMF eluent, PMMA standards).**

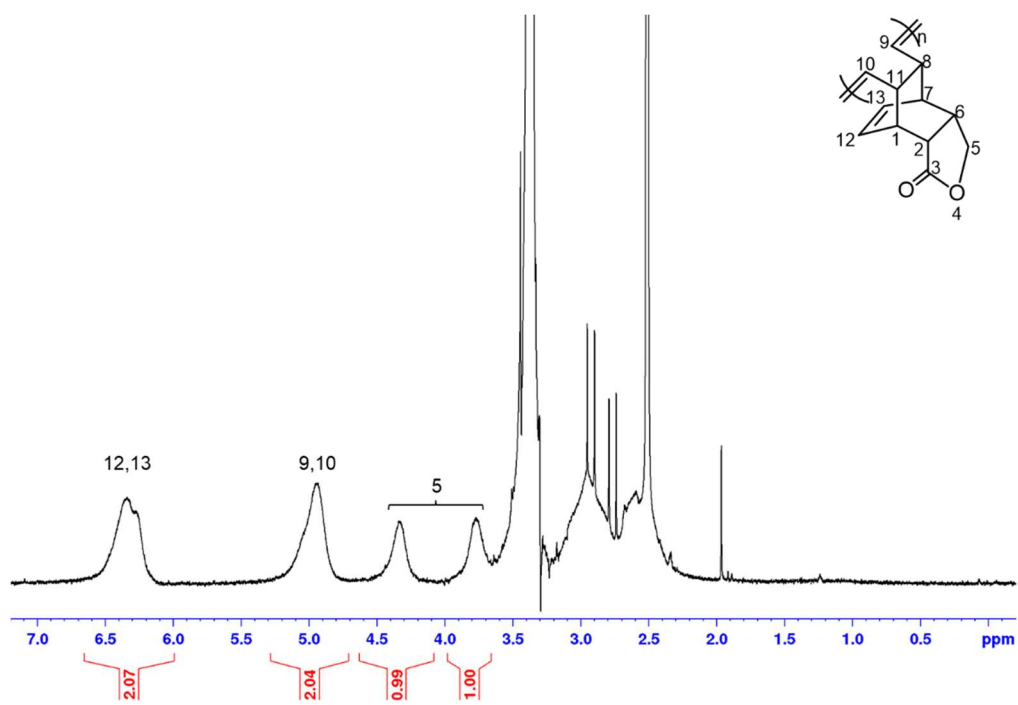

Figure S22. <sup>1</sup>H NMR spectrum of poly1 in DMSO-*d*<sub>6</sub> (400 MHz).

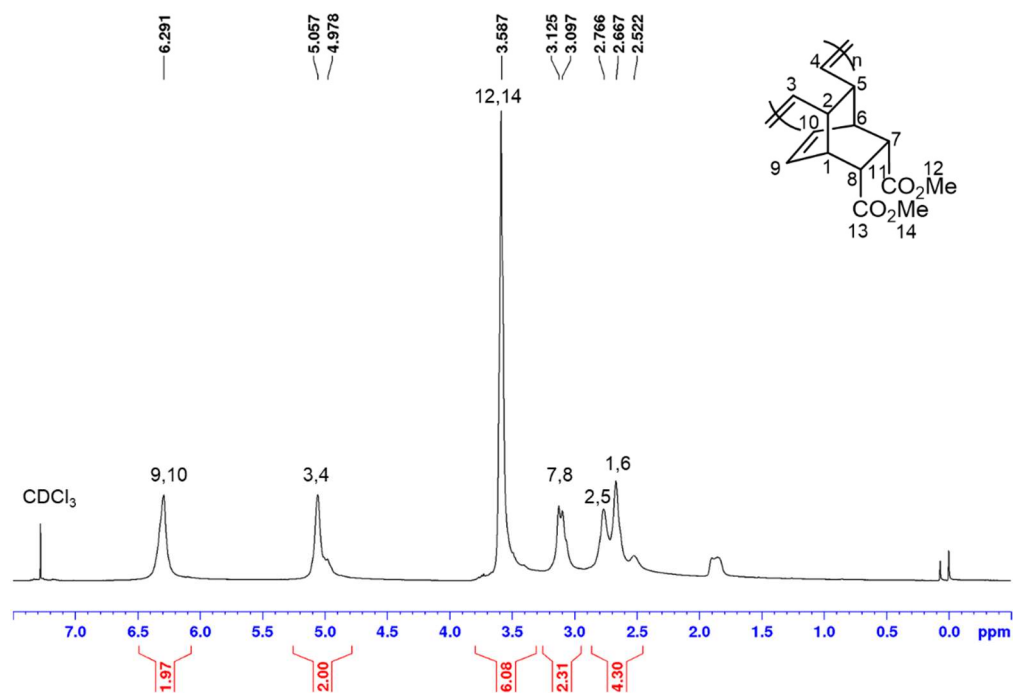

Figure S23. <sup>1</sup>H NMR spectrum of poly2 in CDCl<sub>3</sub> (400 MHz).

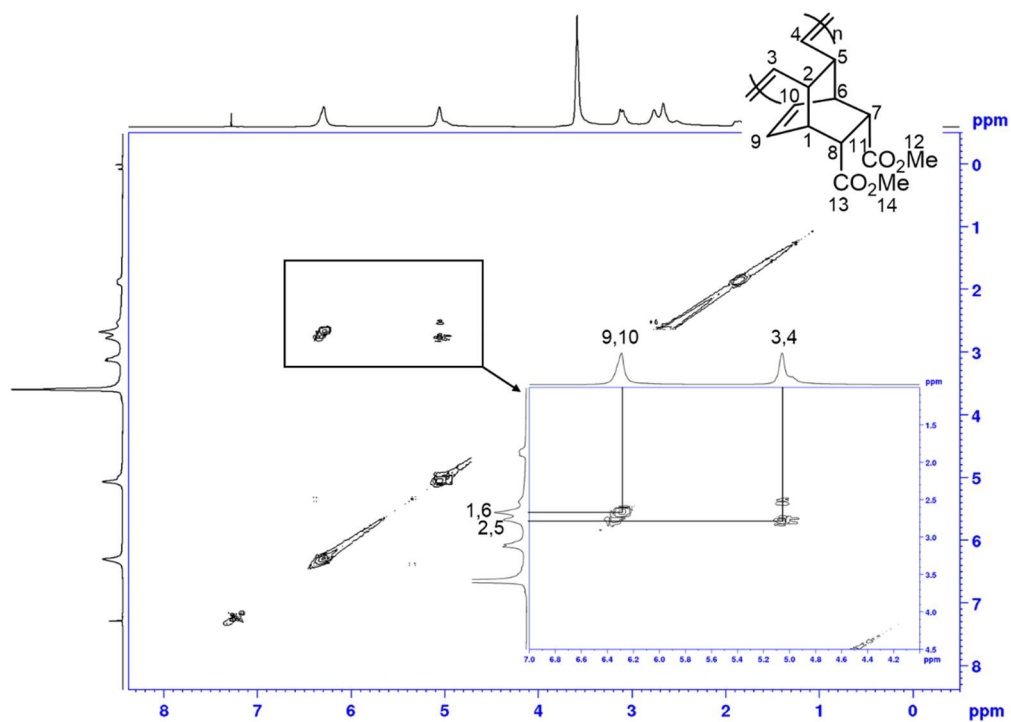

Figure S24. COSY spectrum of poly2.

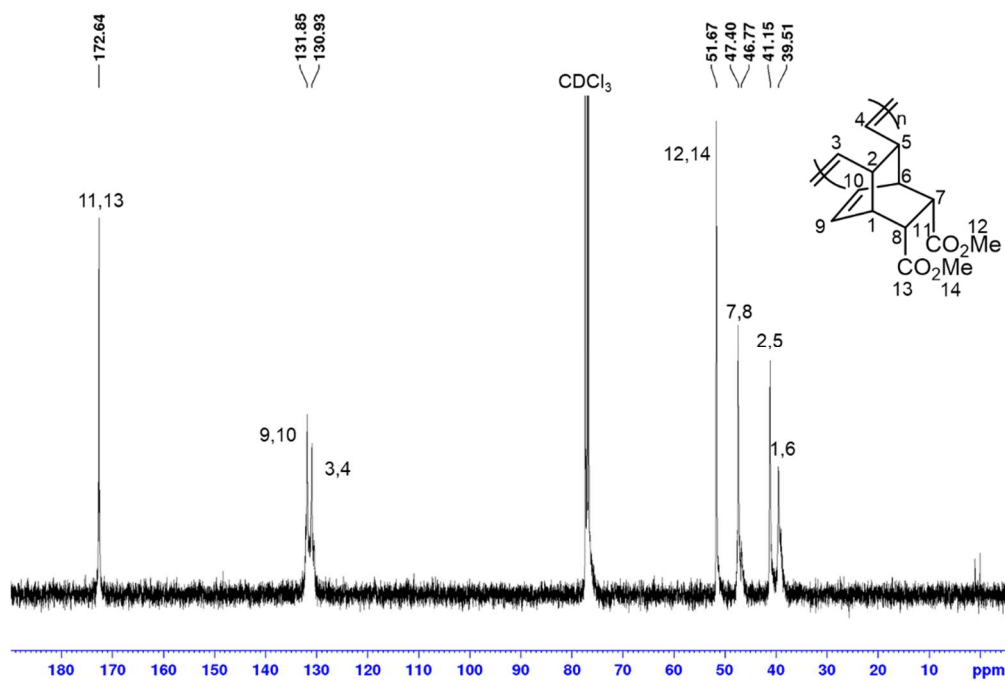

Figure S25. <sup>13</sup>C NMR spectrum of poly2 in CDCl<sub>3</sub> (100 MHz).

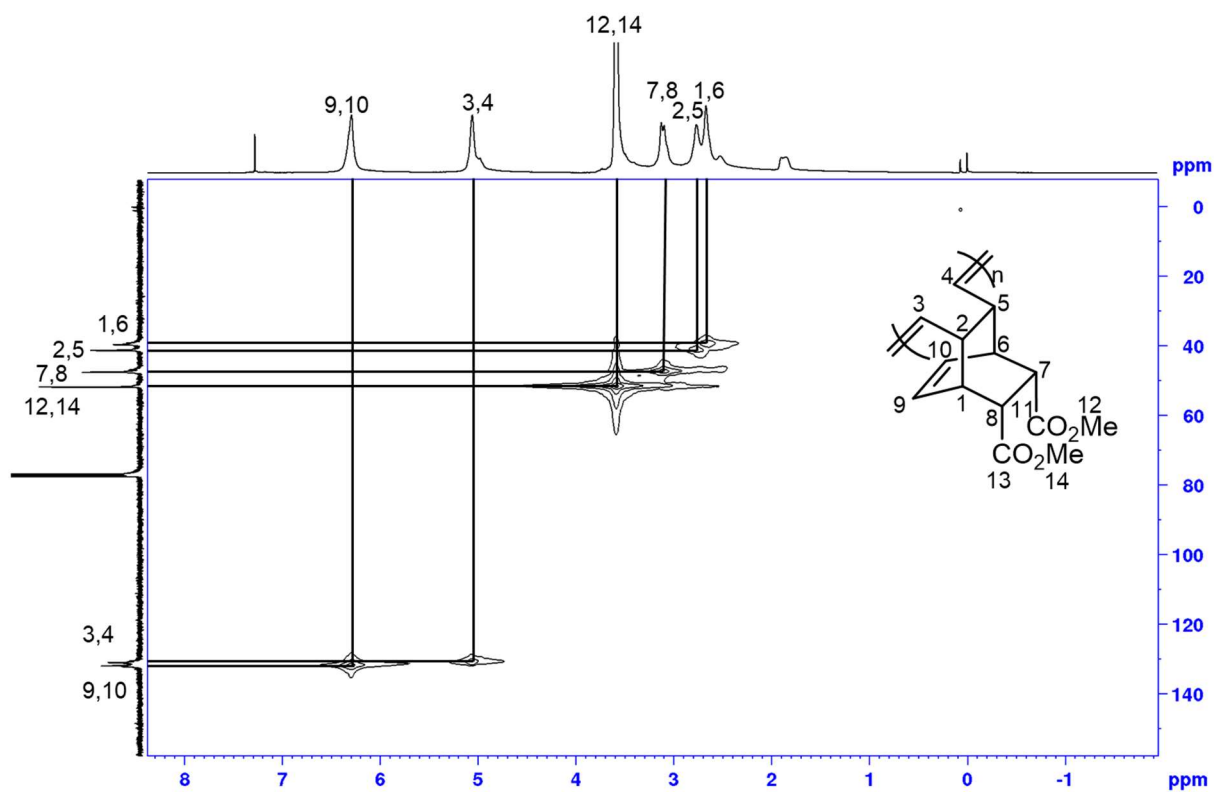

Figure S26. HMBC spectrum of poly2.

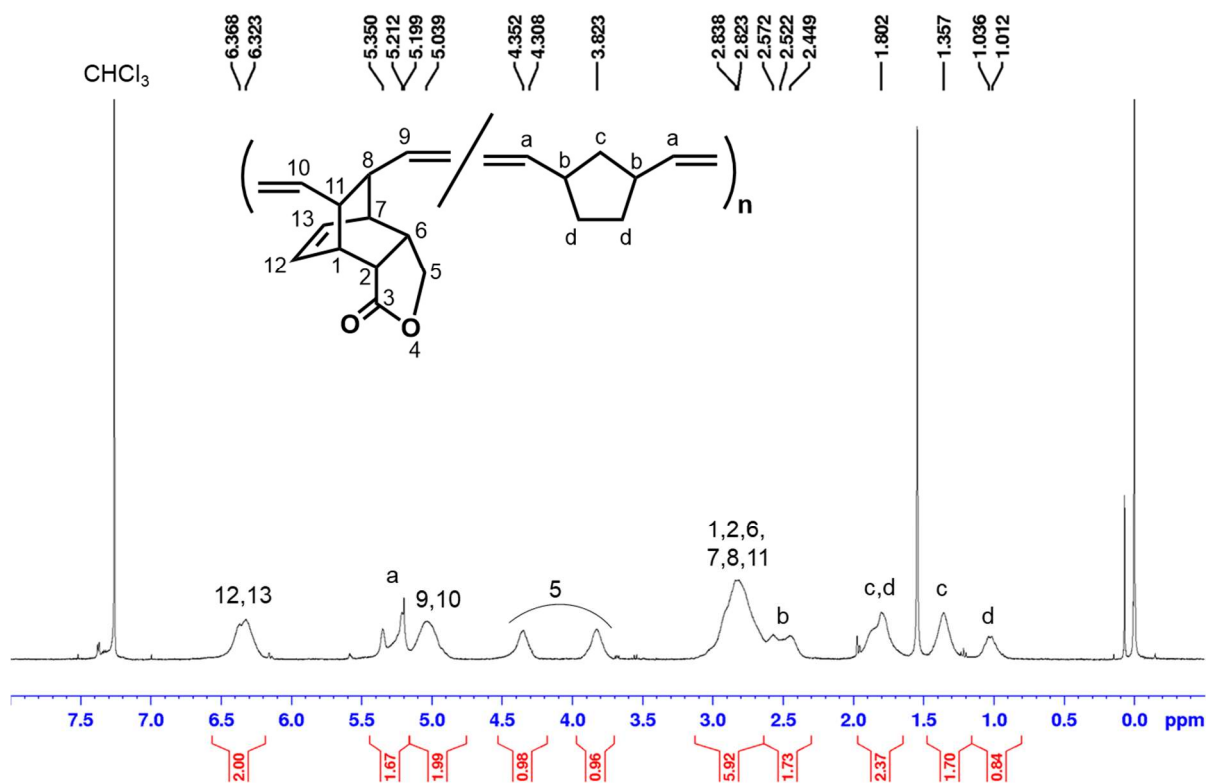

Figure S27. <sup>1</sup>H NMR spectrum of poly(1-co-NB) in CDCl<sub>3</sub> (400 MHz).

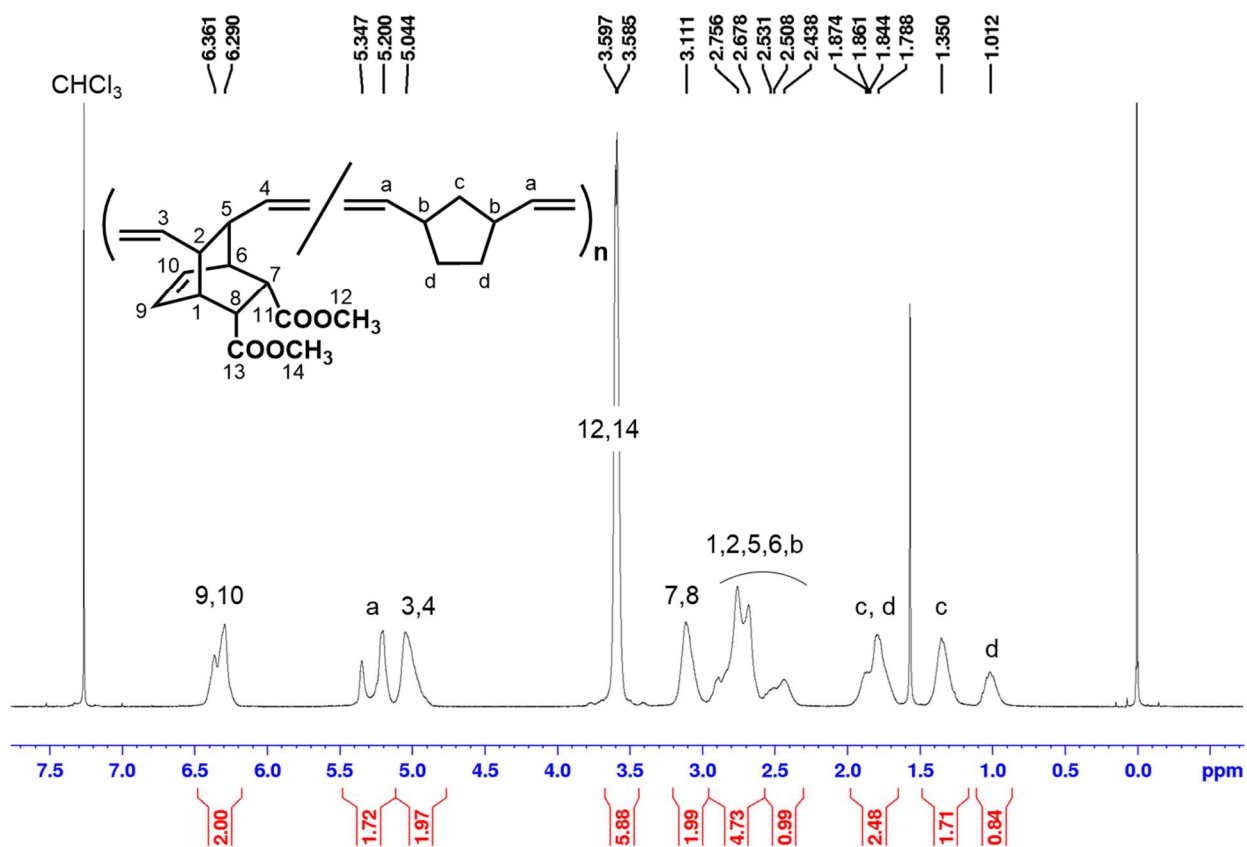

Figure S28.  $^1\text{H}$  NMR spectrum of poly(2-co-NB) in  $\text{CDCl}_3$  (400 MHz).
